# Supplementary material for: The Development and Acceptability of a Wilderness Programme to Support the Health and Well-Being of Adolescent and Young Adult Cancer Survivors: The WAYA Programme
Source: MDPI journal article supplement (doi:10.3390/ijerph191912012), 2022-09-22
Supplement: s1 [file s1]

# NAFKAM

Nasjonalt forskningssenter innen  
komplementær og alternativ medisin

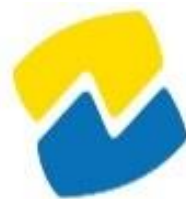

## Mittuniversitetet

MID SWEDEN UNIVERSITY

**Field diary Facilitators**

**Wilderness Program 14-21 June 2021**

The **WAYA** study (Wilderness program for Adolescent and Young Adult cancer survivors)

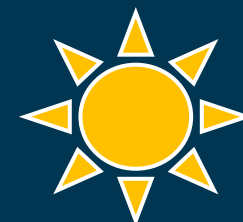

## Contact list responsible body

| Name         | Role                                                        | Responsibility                                                               |
|--------------|-------------------------------------------------------------|------------------------------------------------------------------------------|
| Mats Jong    | Principal Investigator (PI)                                 | WAYA study research activities                                               |
| Miek Jong    | Co-Principal Investigator (CPI)                             | WAYA study research coordination                                             |
| Sture Espwal | Leader Department of Health Sciences, Mid Sweden University | WAYA study, as part of research project at the Department of Health Sciences |

## Relevant emergency telephone numbers

| Telephone    | Body                                    | Website                                                                                                                                                                                                                                                                                                                                               |
|--------------|-----------------------------------------|-------------------------------------------------------------------------------------------------------------------------------------------------------------------------------------------------------------------------------------------------------------------------------------------------------------------------------------------------------|
| <b>112</b>   | Räddningstjänsten                       | <a href="https://www.sosalarm.se/112/Om-112/Att-larma-112/nar-ska-du-ringa-112/">https://www.sosalarm.se/112/Om-112/Att-larma-112/nar-ska-du-ringa-112/</a>                                                                                                                                                                                           |
| 1177         | Sjukvårdsupplysningen                   | <a href="http://www.1177.se/">http://www.1177.se/</a>                                                                                                                                                                                                                                                                                                 |
| 0200 290090  | Sjöräddningen, förebyggande uttryckning | <a href="https://www.sjoraddning.se/om-oss/kontakta-oss">https://www.sjoraddning.se/om-oss/kontakta-oss</a>                                                                                                                                                                                                                                           |
| 054 22 12 00 | Study Insurance Kammarkollegiet         | <a href="https://www.kammarkollegiet.se/vara-tjanster/forsakring-och-riskhantering/hitta-forsakringsprodukt/personforsakringar/ovriga-personskador/sarskilt-personskadeskydd">https://www.kammarkollegiet.se/vara-tjanster/forsakring-och-riskhantering/hitta-forsakringsprodukt/personforsakringar/ovriga-personskador/sarskilt-personskadeskydd</a> |

## PROGRAM

**Day 1: 14 June 2021**

|                      |                                                                                                                                                                                                  |
|----------------------|--------------------------------------------------------------------------------------------------------------------------------------------------------------------------------------------------|
| <b>Location</b>      | Glosand (Härnösand): Coordinates N 6933196, E 646543 (SWEREF 99 TM)                                                                                                                              |
| <b>Journey</b>       | Home address till Glosand by plane, train, bus, car, foot                                                                                                                                        |
| <b>Starting time</b> | As from 14:00                                                                                                                                                                                    |
| <b>Measurements</b>  | <ul style="list-style-type: none"><li>- COVID-19 tests</li><li>- Blood Pressure and Heart Rate</li><li>- Height, weight</li><li>- Six-minute walk test</li><li>- Oxygen Uptake (OU)</li></ul>    |
| <b>Instructions</b>  | <ul style="list-style-type: none"><li>- Delivery of outdoor equipment and how to use it (preparing for the night)</li><li>- Pooping, hygiene</li><li>- Cooking/food/water instructions</li></ul> |
| <b>Activities</b>    | <ul style="list-style-type: none"><li>- Start of the Program: introduction and rules</li><li>- Setting up tent</li><li>- Outdoor cooking</li><li>- Camp fire</li></ul>                           |
| <b>Exercises</b>     | <ul style="list-style-type: none"><li>- Closing mindfulness meditation</li></ul>                                                                                                                 |

## Day 1: 14 June 2021

Have you observed any 'almost' accidents/incidents/close call:

☐ YES   ☐ NO

in case of YES, please describe what:

Have any accidents/incidents occurred today?

☐ YES   ☐ NO

in case of YES, please describe what, where, how:

Name of the participant(s) involved:

Experienced effect on the participants (describe condition, symptoms, etc):

Intensity of the accident/incident (neglectable, mild, noticeable, severe):

Action/measure (describe how you/others have acted such as care, medication, other):

Follow-up (describe if and what is needed regarding follow-up monitoring):

Have you provided any medication to participants (other than related to the accident/incident)?

☐ YES ☐ NO

in case of YES, please describe what:

Have you provided any specific support to participants (physical, mental, other)?

☐ YES ☐ NO

in case of YES, please describe what:

Have you given any specific program-related instruction to participants?

☐ YES   ☐ NO

in case of YES, please describe what:

Did you lack any outdoor equipment or miss any other necessary items?

☐ YES   ☐ NO

in case of YES, please describe what:

Please estimate the number of hours today (between 7:30-21:00) in which participants had free (leisure) time, and thus were not involved in any program-related (group) activity

Number: ..... hours

Other relevant notes:





## Day 2: 15 June 2021

|                                                         |                                                                                                                                                                                                                                                 |
|---------------------------------------------------------|-------------------------------------------------------------------------------------------------------------------------------------------------------------------------------------------------------------------------------------------------|
| <b>Location</b>                                         | Dalsjön (Käxed, Kramfors): Coordinates N 7000417, E 672355 (SWEREF 99 TM)                                                                                                                                                                       |
| <b>Journey</b>                                          | Driving: 1:15 hour by car<br>Distance: 7 km hiking (6 hours) to Dalsjön                                                                                                                                                                         |
| <b>Starting time</b>                                    | As from 7:30                                                                                                                                                                                                                                    |
| <b>Measurements</b><br>(if not finished the day before) | <ul style="list-style-type: none"><li>- COVID-19 tests</li><li>- Blood Pressure and Heart Rate</li><li>- Height, weight</li><li>- Six-minute walk test</li><li>- Oxygen Uptake (OU)</li></ul>                                                   |
| <b>Instructions</b>                                     | <ul style="list-style-type: none"><li>- Packing-up (back-pack)</li><li>- Mapping/compass</li><li>- Safety skills training</li><li>- Equipment planning</li><li>- Eatable things in nature</li><li>- Allemansrätten and leave no trace</li></ul> |
| <b>Activities</b>                                       | <ul style="list-style-type: none"><li>- Hiking (including lunch)</li><li>- Setting up camp (dinner)</li></ul>                                                                                                                                   |
| <b>Exercises</b>                                        | <ul style="list-style-type: none"><li>- Check-in (before leaving)</li><li>- Check-out: (end of the day)</li><li>- Reflective mindfulness exercise</li></ul>                                                                                     |

## Day 2: 15 June 2021

Have you observed any 'almost' accidents/incidents/close call:

☐ YES ☐ NO

in case of YES, please describe what:

Have any accidents/incidents occurred today?

☐ YES ☐ NO

in case of YES, please describe what, where, how:

Name of the participant(s) involved:

Experienced effect on the participants (describe condition, symptoms, etc):

Intensity of the accident/incident (neglectable, mild, noticeable, severe):

Action/measure (describe how you/others have acted such as care, medication, other):

Follow-up (describe if and what is needed regarding follow-up monitoring):

Have you provided any medication to participants (other than related to the accident/incident)?

☐ YES ☐ NO

in case of YES, please describe what:

Have you provided any specific support to participants (physical, mental, other)?

☐ YES ☐ NO

in case of YES, please describe what:

Have you given any specific program-related instruction to participants?

☐ YES   ☐ NO

in case of YES, please describe what:

Did you lack any outdoor equipment or miss any other necessary items?

☐ YES   ☐ NO

in case of YES, please describe what:

Please estimate the number of hours today (between 7:30-21:00) in which participants had free (leisure) time, and thus were not involved in any program-related (group) activity

Number: .....hours

Other relevant notes:



## Day 3: 16 June 2021

|                      |                                                                                                                                                                                   |
|----------------------|-----------------------------------------------------------------------------------------------------------------------------------------------------------------------------------|
| <b>Location</b>      | Kälaviken (Käl, Kramfors): Coordinates N 6999825, E 677273 (SWEREF 99 TM)                                                                                                         |
| <b>Journey</b>       | Distance: 10 km (8 hours) hiking to Kälaviken                                                                                                                                     |
| <b>Starting time</b> | As from 7:30                                                                                                                                                                      |
| <b>Instructions</b>  | <ul style="list-style-type: none"><li>- Mapping/compass</li><li>- Safety skills training</li><li>- Eatable things in nature</li><li>- Allemansrätten and leave no trace</li></ul> |
| <b>Activities</b>    | <ul style="list-style-type: none"><li>- Hiking (including lunch)</li><li>- Setting up camp (dinner)</li></ul>                                                                     |
| <b>Exercises</b>     | <ul style="list-style-type: none"><li>- Check-in (before leaving)</li><li>- Check-out: (end of the day)</li><li>- Reflective mindfulness exercise</li></ul>                       |

### Day 3: 16 June 2021

Have you observed any 'almost' accidents/incidents/close call:

☐ YES   ☐ NO

in case of YES, please describe what:

Have any accidents/incidents occurred today?

☐ YES   ☐ NO

in case of YES, please describe what, where, how:

Name of the participant(s) involved:

Experienced effect on the participants (describe condition, symptoms, etc):

Intensity of the accident/incident (neglectable, mild, noticeable, severe):



Action/measure (describe how you/others have acted such as care, medication, other):

Follow-up (describe if and what is needed regarding follow-up monitoring):

Have you provided any medication to participants (other than related to the accident/incident)?

☐ YES ☐ NO

in case of YES, please describe what:

Have you provided any specific support to participants (physical, mental, other)?

☐ YES ☐ NO

in case of YES, please describe what:

Day 3: Have you given any specific program-related instruction to participants?

☐ YES   ☐ NO

in case of YES, please describe what:

Did you lack any outdoor equipment or miss any other necessary items?

☐ YES   ☐ NO

in case of YES, please describe what:

Please estimate the number of hours today (between 7:30-21:00) in which participants had free (leisure) time, and thus were not involved in any program-related (group) activity

Number: .....hours

Other relevant notes:



## Day 4: 17 June 2021

|                      |                                                                                                                                                                                                                          |
|----------------------|--------------------------------------------------------------------------------------------------------------------------------------------------------------------------------------------------------------------------|
| <b>Location</b>      | Kälaviken (Käl, Kramfors): Coordinates N 6999825, E 677273 (SWEREF 99 TM)                                                                                                                                                |
| <b>Journey</b>       | Kayaking in Kälaviken bay (2-3 hours)                                                                                                                                                                                    |
| <b>Starting time</b> | As from 7:30                                                                                                                                                                                                             |
| <b>Instructions</b>  | <ul style="list-style-type: none"><li>- Mapping/compass</li><li>- Safety skills training</li><li>- Eatable things in nature</li><li>- Allemansrätten and leave no trace</li><li>- Kayaking safety &amp; skills</li></ul> |
| <b>Activities</b>    | <ul style="list-style-type: none"><li>- Kayaking</li></ul>                                                                                                                                                               |
| <b>Exercises</b>     | <ul style="list-style-type: none"><li>- Check-in (before leaving)</li><li>- Check-out: (end of the day)</li><li>- Meditation</li></ul>                                                                                   |

## Day 4: 17 June 2021

Have you observed any 'almost' accidents/incidents/close call:

☐ YES   ☐ NO

in case of YES, please describe what:

Have any accidents/incidents occurred today?

☐ YES   ☐ NO

in case of YES, please describe what, where, how:

Name of the participant(s) involved:

Experienced effect on the participants (describe condition, symptoms, etc):

Intensity of the accident/incident (neglectable, mild, noticeable, severe):

Action/measure (describe how you/others have acted such as care, medication, other):

Follow-up (describe if and what is needed regarding follow-up monitoring):

Have you provided any medication to participants (other than related to the accident/incident)?

☐ YES ☐ NO

in case of YES, please describe what:

Have you provided any specific support to participants (physical, mental, other)?

☐ YES ☐ NO

in case of YES, please describe what:

Have you given any specific program-related instruction to participants?

☐ YES   ☐ NO

in case of YES, please describe what:

Did you lack any outdoor equipment or miss any other necessary items?

☐ YES   ☐ NO

in case of YES, please describe what:

Please estimate the number of hours today (between 7:30-21:00) in which participants had free (leisure) time, and thus were not involved in any program-related (group) activity

Number: .....hours



Other relevant notes:



## Day 5: 18 June 2021

|                      |                                                                                                                                                                                                                          |
|----------------------|--------------------------------------------------------------------------------------------------------------------------------------------------------------------------------------------------------------------------|
| <b>Location</b>      | Baggsandsbukten (Mjältön, Kramfors): Coordinates N 6994059, E 677999 (SWEREF 99 TM)                                                                                                                                      |
| <b>Journey</b>       | Distance: Kayaking (6 km)<br>Hiking (2.5 km)                                                                                                                                                                             |
| <b>Starting time</b> | As from 7:30                                                                                                                                                                                                             |
| <b>Instructions</b>  | <ul style="list-style-type: none"><li>- Mapping/compass</li><li>- Safety skills training</li><li>- Eatable things in nature</li><li>- Allemansrätten and leave no trace</li><li>- Kayaking safety &amp; skills</li></ul> |
| <b>Activities</b>    | <ul style="list-style-type: none"><li>- Kayaking (including lunch)</li><li>- Hiking</li><li>- Setting up camp (dinner)</li></ul>                                                                                         |
| <b>Exercises</b>     | <ul style="list-style-type: none"><li>- Check-in (before leaving)</li><li>- Check-out: (end of the day)</li><li>- Mindfulness exercise</li></ul>                                                                         |

## Day 5: 18 June 2021

Have you observed any 'almost' accidents/incidents/close call:

☐ YES   ☐ NO

in case of YES, please describe what:

Have any accidents/incidents occurred today?

☐ YES   ☐ NO

in case of YES, please describe what, where, how:

Name of the participant(s) involved:

Experienced effect on the participants (describe condition, symptoms, etc):

Intensity of the accident/incident (neglectable, mild, noticeable, severe):

Action/measure (describe how you/others have acted such as care, medication, other):

Follow-up (describe if and what is needed regarding follow-up monitoring):

Have you provided any medication to participants (other than related to the accident/incident)?

☐ YES ☐ NO

in case of YES, please describe what:

Have you provided any specific support to participants (physical, mental, other)?

☐ YES ☐ NO

in case of YES, please describe what:

Day 5: Have you given any specific program-related instruction to participants?

☐ YES   ☐ NO

in case of YES, please describe what:

Did you lack any outdoor equipment or miss any other necessary items?

☐ YES   ☐ NO

in case of YES, please describe what:

- Please estimate the number of hours today (between 7:30-21:00) in which participants had free (leisure) time, and thus were not involved in any program-related (group) activity

Number: .....hours

**Other relevant notes:**





## Day 6: 19 June 2021

|                      |                                                                                                                                                                                   |
|----------------------|-----------------------------------------------------------------------------------------------------------------------------------------------------------------------------------|
| <b>Location</b>      | Baggsandsbukten (Mjältön, Kramfors): Coordinates N 6994059, E 677999 (SWEREF 99 TM)                                                                                               |
| <b>Journey</b>       | Distance: Hiking (6 km) to top Mjältön island                                                                                                                                     |
| <b>Starting time</b> | As from 7:30                                                                                                                                                                      |
| <b>Instructions</b>  | <ul style="list-style-type: none"><li>- Mapping/compass</li><li>- Safety skills training</li><li>- Eatable things in nature</li><li>- Allemansrätten and leave no trace</li></ul> |
| <b>Activities</b>    | <ul style="list-style-type: none"><li>- Hiking</li><li>- Gorge climbing</li></ul>                                                                                                 |
| <b>Exercises</b>     | <ul style="list-style-type: none"><li>- Check-in (before leaving)</li><li>- Check-out: (end of the day)</li><li>- Mindfulness exercises</li></ul>                                 |

## Day 6: 19 June 2021

Have you observed any 'almost' accidents/incidents/close call:

☐ YES   ☐ NO

in case of YES, please describe what:

Have any accidents/incidents occurred today?

☐ YES   ☐ NO

in case of YES, please describe what, where, how:

Name of the participant(s) involved:

Experienced effect on the participants (describe condition, symptoms, etc):

Intensity of the accident/incident (neglectable, mild, noticeable, severe):

Action/measure (describe how you/others have acted such as care, medication, other):

Follow-up (describe if and what is needed regarding follow-up monitoring):

Have you provided any medication to participants (other than related to the accident/incident)?

☐ YES   ☐ NO

in case of YES, please describe what:

Have you provided any specific support to participants (physical, mental, other)?

☐ YES   ☐ NO

in case of YES, please describe what:

Have you given any specific program-related instruction to participants?

☐ YES   ☐ NO

in case of YES, please describe what:

Did you lack any outdoor equipment or miss any other necessary items?

☐ YES   ☐ NO

in case of YES, please describe what:

Please estimate the number of hours today (between 7:30-21:00) in which participants had free (leisure) time, and thus were not involved in any program-related (group) activity

Number: .....hours

**Other relevant notes:**



## Day 7: 20 June 2021

|                      |                                                                                                                                                                                                                   |
|----------------------|-------------------------------------------------------------------------------------------------------------------------------------------------------------------------------------------------------------------|
| <b>Location</b>      | Sund (Kramfors): Coordinates N 6995006, E 674620 (SWEREF 99 TM)                                                                                                                                                   |
| <b>Journey</b>       | Distance: Hiking (4 km)<br>Kayaking (1.5 km)                                                                                                                                                                      |
| <b>Starting time</b> | As from 7:30                                                                                                                                                                                                      |
| <b>Instructions</b>  | <ul style="list-style-type: none"><li>- Mapping/compass</li><li>- Safety skills training</li><li>- Eatable things in nature</li><li>- Allemansrätten and leave no trace</li><li>- Kayaking instructions</li></ul> |
| <b>Activities</b>    | <ul style="list-style-type: none"><li>- Hiking</li><li>- Kayaking</li></ul>                                                                                                                                       |
| <b>Exercises</b>     | <ul style="list-style-type: none"><li>- Check-in (before leaving)</li><li>- Check-out (end of the day)</li></ul>                                                                                                  |

## Day 7: 20 June 2021

Have you observed any 'almost' accidents/incidents/close call:

☐ YES   ☐ NO

in case of YES, please describe what:

Have any accidents/incidents occurred today?

☐ YES   ☐ NO

in case of YES, please describe what, where, how:

Name of the participant(s) involved:

Experienced effect on the participants (describe condition, symptoms, etc):

Intensity of the accident/incident (neglectable, mild, noticeable, severe):



Action/measure (describe how you/others have acted such as care, medication, other):

Follow-up (describe if and what is needed regarding follow-up monitoring):

Have you provided any medication to participants (other than related to the accident/incident)?

☐ YES ☐ NO

in case of YES, please describe what:

Have you provided any specific support to participants (physical, mental, other)?

☐ YES ☐ NO

in case of YES, please describe what:

Have you given any specific program-related instruction to participants?

☐ YES   ☐ NO

in case of YES, please describe what:

Did you lack any outdoor equipment or miss any other necessary items?

☐ YES   ☐ NO

in case of YES, please describe what:

Please estimate the number of hours today (between 7:30-21:00) in which participants had free (leisure) time, and thus were not involved in any program-related (group) activity

Number: .....hours

**Other relevant notes:**



## Day 8: 21 June 2021

|                      |                                                                 |
|----------------------|-----------------------------------------------------------------|
| <b>Location</b>      | Sund (Kramfors): Coordinates N 6995006, E 674620 (SWEREF 99 TM) |
| <b>Journey</b>       | Travelling home by car, train, bus, flight                      |
| <b>Starting time</b> | As from 7:30                                                    |
| <b>Instructions</b>  | - Packing-up for home                                           |
| <b>Exercises</b>     | - Check-out (before leaving)                                    |

## Day 8: 21 June 2021

Have you observed any 'almost' accidents/incidents/close call:

☐ YES   ☐ NO

in case of YES, please describe what:

Have any accidents/incidents occurred today?

☐ YES   ☐ NO

in case of YES, please describe what, where, how:

Name of the participant(s) involved:

Experienced effect on the participants (describe condition, symptoms, etc):

Intensity of the accident/incident (neglectable, mild, noticeable, severe):

Action/measure (describe how you/others have acted such as care, medication, other):

Follow-up (describe if and what is needed regarding follow-up monitoring):

Have you provided any medication to participants (other than related to the accident/incident)?

☐ YES ☐ NO

in case of YES, please describe what:

Have you provided any specific support to participants (physical, mental, other)?

☐ YES ☐ NO

in case of YES, please describe what:

Have you given any specific program-related instruction to participants?

☐ YES   ☐ NO

in case of YES, please describe what:

Did you lack any outdoor equipment or miss any other necessary items?

☐ YES   ☐ NO

in case of YES, please describe what:

Please estimate the number of hours today (between 7:30-21:00) in which participants had free (leisure) time, and thus were not involved in any program-related (group) activity

Number: .....hours



**Other relevant notes:**

## **Telephone numbers of facilitators**
